# Supplementary material for: A novel aptamer-mediated CuInS2quantum dots@graphene oxide nanocomposites-based fluorescence “turn off–on” nanosensor for highly sensitive and selective detection of kanamycin
Source: Royal Society of Chemistry journal article supplement (doi:10.1039/c5ra22753d), 2016-01-01
Supplement: c5ra22753d1.pdf [file c5ra22753d1.pdf]

1 **A novel aptamer-mediated CuInS<sub>2</sub> quantum dots@graphene**  
2 **oxide nanocomposites-based fluorescence “turn off-on”**  
3 **nanosensor for highly sensitive and selective detection of**  
4 **kanamycin**

5 Ziping Liu<sup>a</sup>, Chengshuo Tian<sup>a</sup>, Lehui Lu<sup>b</sup> and Xingguang Su<sup>a\*</sup>

6 *<sup>a</sup>Department of Analytical Chemistry, College of Chemistry, Jilin University,*  
7 *Changchun 130012, P.R. China*

8 *<sup>b</sup>State Key Laboratory of Electroanalytical Chemistry, Changchun Institute of*  
9 *Applied Chemistry, Chinese Academy of Sciences, Changchun, 130022, China*

10

11

12

13

14

15 \*Corresponding author

16 *Tel.: +86-431-85168352*

17 *E-mail*

*address:*

*[suxg@jlu.edu.cn](mailto:suxg@jlu.edu.cn)*

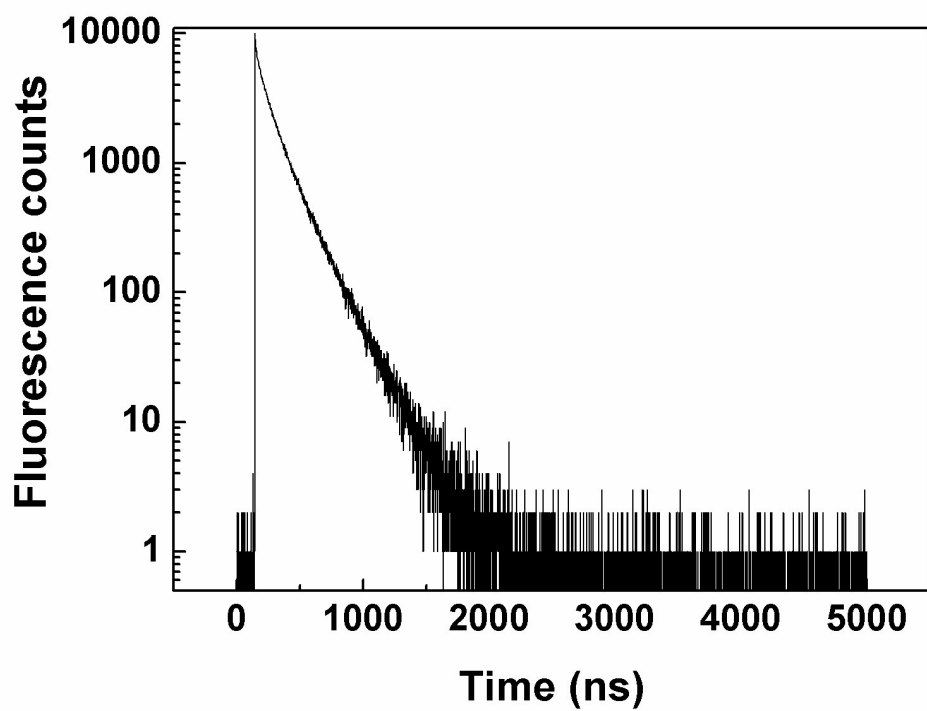

1

2 Fig. S1 Fluorescence decay curves of the CuInS<sub>2</sub> QDs in aqueous solution.

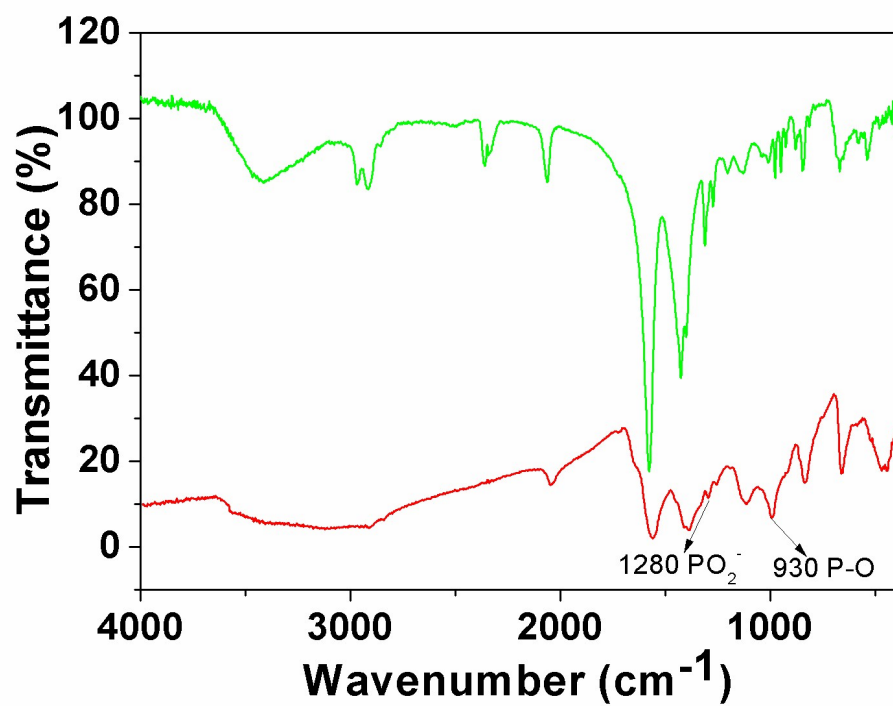

1

2 Fig. S2 The FT-IR spectra of the MPA capped CuInS<sub>2</sub> QDs (green curve) and Ky<sub>2</sub>-CuInS<sub>2</sub> QDs

3 (red curve).

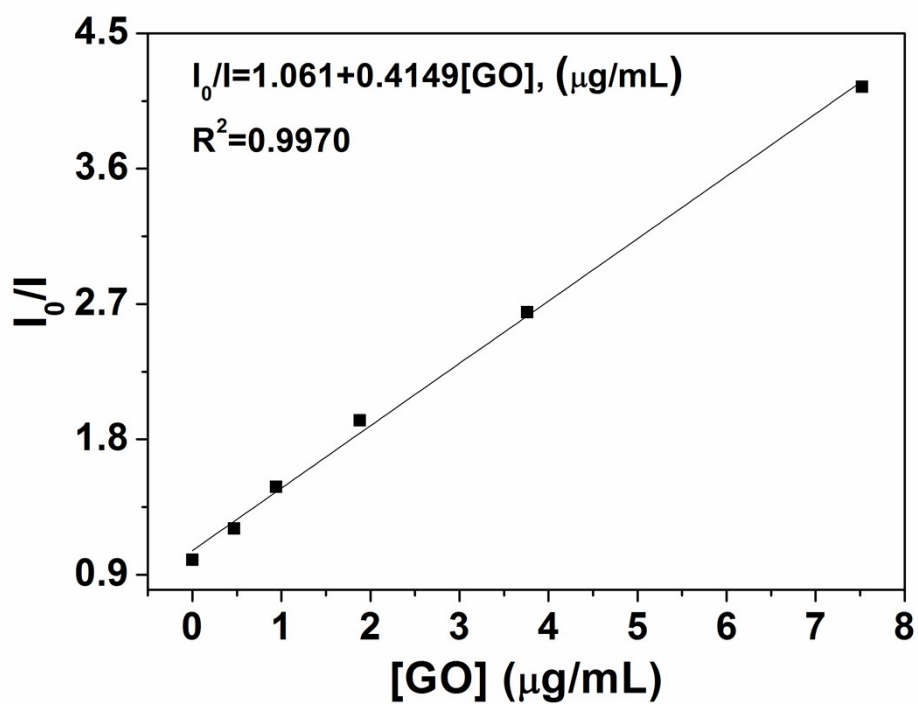

1

2 Fig. S3 The relationship between  $I_0/I$  and the concentration of GO (from 0 to  $7.52 \mu\text{g}\cdot\text{mL}^{-1}$ ).  $I$  and

3  $I_0$  were the fluorescence intensity of  $\text{Ky}2\text{-CuInS}_2$  QDs in the presence and absence of GO,

4 respectively.

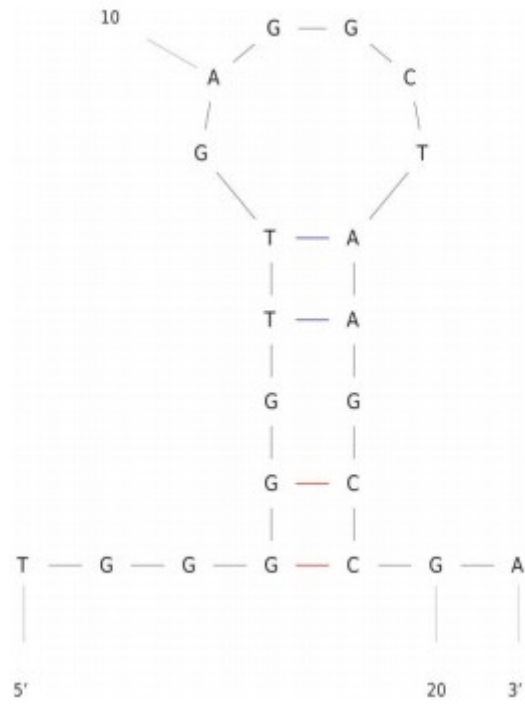

1

2 Fig. S4 The secondary structure of the Ky2 aptamer as predicted by M-Fold tool based on Zuker

3 algorithm.

1 **Table S1** Comparison of different methods for the determination of kanamycin

| Methods          | Linear range (nM)                           | LOD (nM)           | Response time | Reference |
|------------------|---------------------------------------------|--------------------|---------------|-----------|
| Colorimetry      | 1-100                                       | 1.49               | 3-8 min       | [1]       |
| Colorimetry      | —                                           | 25                 | > 1 h         | [2]       |
| Colorimetry      | —                                           | 2000               | —             | [3]       |
| Luminescence     | $2.0 \times 10^{-2}$ - $1.5 \times 10^{-5}$ | $1.43 \times 10^2$ | 20 min        | [4]       |
| HF-LPME-ECL      | 1-500                                       | 1                  | —             | [5]       |
| Electrochemistry | 3.43-171.65                                 | 1.15               | 45 min        | [6]       |
| FRET             | 10-200                                      | 8.6                | —             | [7]       |
| Fluorometry      | 0.3-45                                      | 0.12               | 12 min        | This work |

## 1 References

---

- 1 T. K. Sharma, R. Ramanathan, P. Weerathunge, M. Mohammadtaheri, H. K. Daima, R. Shukla and V. Bansal, *Chem. Commun.*, 2014, **50**, 15856-15859.
- 2 K. M. Song, M. Cho, H. Jo, K. Min, S. H. Jeon, T. Kim, M. S. Han, J. K. Ku, C. Ban, *Anal. Biochem.*, 2011, **415**, 175-181.
- 3 A. A. Rowe, E. A. Miller, K. W. Plaxco, *Anal. Chem.*, 2010, **82**, 7090-7095.
- 4 K. H. Leung, H. Z. He, D. S. H. Chan, W. C. Fu, C. H. leung, D. L. Ma, *Sens. Actuators B.*, 2013, **177**, 487-492.
- 5 N. D. Zhou, J. Zhang, Y. P. Tian, *Anal. Methods.*, 2013, **6**, 1569-1574.
- 6 H. Wang, W. W. Wu, D. Y. Wei, Z. Y. Guo, S. Wang, *Journal of Electroanalytical Chemistry*, 2014, **735**, 136-141.
- 7 F. L. Li, Y. M. Guo, X. Sun, X. Y. Wang, *Eur Food Res Technol.*, 2014, 239, 227-236.
